# Supplementary material for: Transgenic Mosquitoes Expressing a Phospholipase A2 Gene Have a Fitness Advantage When Fed Plasmodium falciparum-Infected Blood
Source: PubMed Central journal article supplement (PMC3788000; doi:10.1371/journal.pone.0076097), 2013-10-01
Supplement: pone.0076097.s001.pdf [file pone.0076097.s001.pdf]

# **Transgenic mosquitoes expressing a phospholipase A<sub>2</sub> gene have a fitness advantage when fed *Plasmodium falciparum*-infected blood**

**Ryan C. Smith<sup>1</sup>, Christopher Kizito<sup>1</sup>, Jason L. Rasgon<sup>2</sup>, Marcelo Jacobs-Lorena<sup>1\*</sup>**

<sup>1</sup>Department of Molecular Microbiology and Immunology, Malaria Research Institute, Johns Hopkins Bloomberg School of Public Health, Baltimore, Maryland, United States of America.

<sup>2</sup>Department of Entomology, Center for Infectious Disease Dynamics and the Huck Institutes of the Life Sciences, Pennsylvania State University, University Park, Pennsylvania, USA.

\*E-mail: [mlorena@jhsph.edu](mailto:mlorena@jhsph.edu)

## **Supporting Information**

**Figure S1. Outline of procedures used to conduct cage experiments.**

**Figure S2. Oocyst numbers in transgenic cage experiments.**

**Figure S3. Genotyping of PLA<sub>2</sub> transgenic lines.**

**Table S1. Primer sequences used for spPCR.**

**EXPERIMENTAL** (maintained on *P. falciparum* - infected blood)

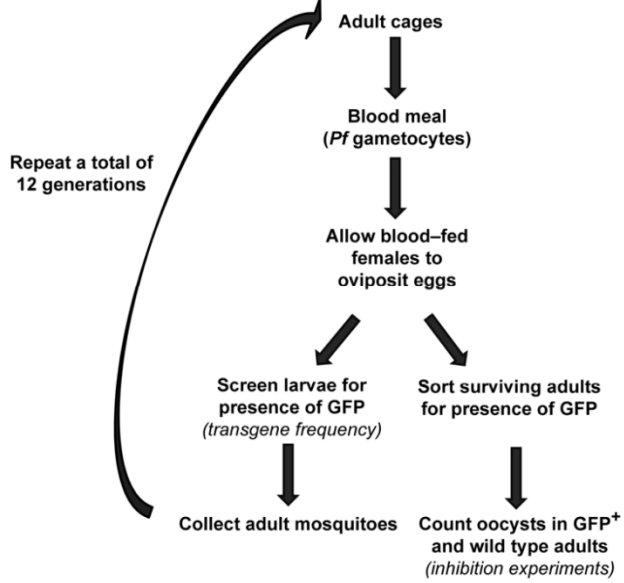

**CONTROL** (maintained on non- infected human blood)

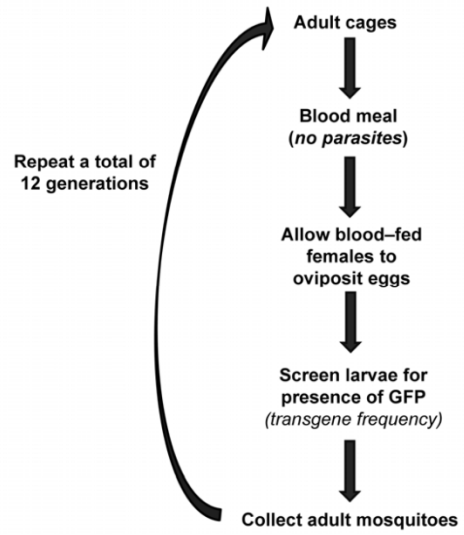

Figure S1. Outline of procedures used to conduct cage experiments.

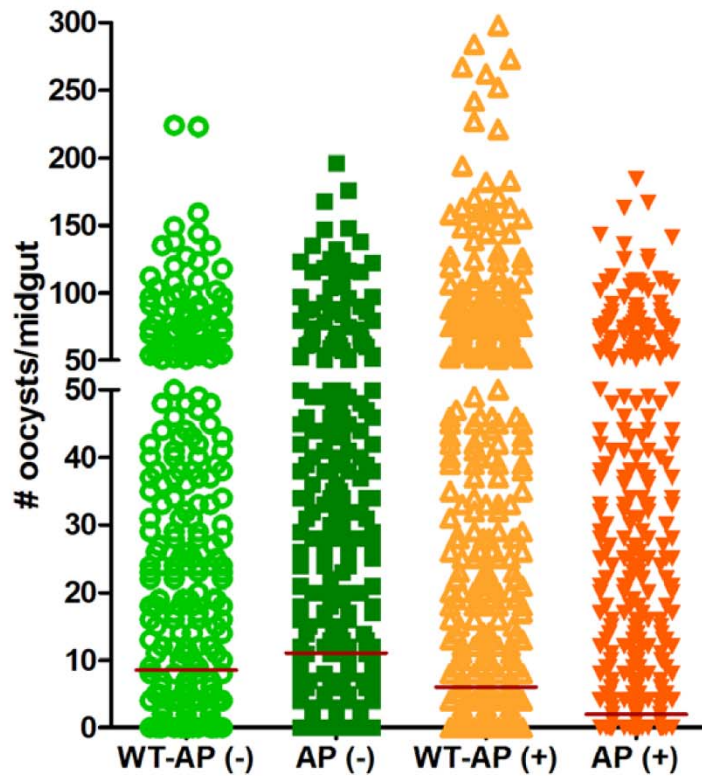

|              |     |        |     |        |
|--------------|-----|--------|-----|--------|
| N            | 370 | 370    | 571 | 558    |
| Prevalence   | 70% | 71%    | 69% | 64%    |
| Mean         | 26  | 26     | 31  | 19     |
| % Inhibition | /   | /      | /   | 39%    |
| Median       | 8.5 | 11     | 6   | 2      |
| % Inhibition | /   | /      | /   | 66%    |
| P-value      |     | 0.9843 |     | <.0001 |

**Figure S2. Oocyst numbers in transgenic cage experiments.** At each generation, adult female mosquitoes from each cage were individually assessed for GFP fluorescence (to distinguish transgenic from non-transgenic mosquitoes), followed by determination of *P. falciparum* oocyst numbers. Combined data for all cage experiments demonstrate that only the AP (+) transgenic line inhibited *P. falciparum* development, similar to the results in Figure 2B. The horizontal red line denotes the median value for each data set. WT-AP (-): wild type control mosquitoes for the AP (-) infections; WT-AP (+): wild type control mosquitoes for the AP (+) infections.

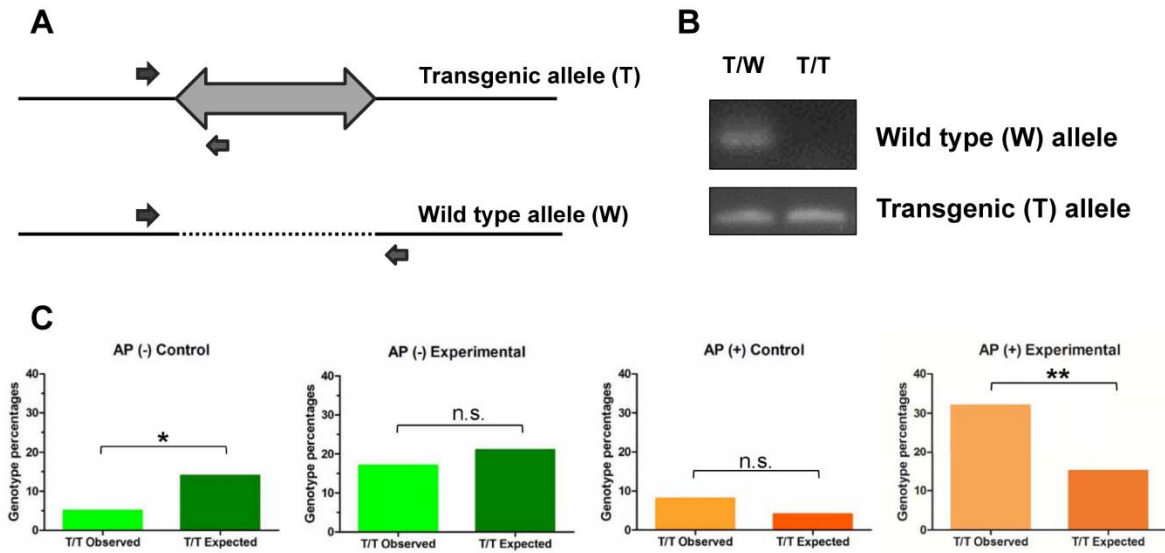

**Figure S3. Genotyping of PLA<sub>2</sub> transgenic lines.** Transgenic mosquitoes from each cage were individually genotyped by PCR to determine if the mosquito was hetero- or homozygous for the transgene. Using primers (grey arrows) that flank each insertion (A), individual GFP+ mosquitoes (containing the transgene) were genotyped by the presence/absence of the wild type allele and verified by the presence of the transgenic locus to distinguish heterozygous (T/W) or homozygous (T/T) individuals (B). Genotyping results for each transgenic cage experiment demonstrate the observed and expected percentages of mosquitoes homozygous for the transgene (C). Only the AP (+) transgenic line maintained on *P. falciparum* infected blood shows an increase in transgene prevalence as determined by Hardy-Weinberg analysis and was tested for significance by Chi-squared analysis. \* = ( $P < 0.05$ ), \*\* = ( $P < 0.01$ ), n.s.: not significant.

**Table S1. Primer sequences used for spPCR.**

| Primer Use              | Name                                            | Sequence                                                     |
|-------------------------|-------------------------------------------------|--------------------------------------------------------------|
| <b>spPCR Adaptor</b>    | Splink-Bottom (Universal)                       | CGAAGAGTAACCGTTGCTAGGAGAGACCGTGGCTGAATGAGACTGGTGTGCGACTAGTGG |
|                         | Splink-GATC-Top ( <i>Bst</i> YI/ <i>Bgl</i> II) | GATCCCCTAGTGTGCGACACCAGTCTCTAATTTTTTTTTTCAAAAAA              |
|                         | Splink-CGG-Top ( <i>Msp</i> I)                  | CGGCCACTAGTGTGCGACACCAGTCTCTAATTTTTTTTTTCAAAAAA              |
|                         | Splink-AATT-Top ( <i>Eco</i> RI)                | AATCCACTAGTGTGCGACACCAGTCTCTAATTTTTTTTTTCAAAAAA              |
| <b>Adaptor primers</b>  | Splink #1                                       | CGAAGAGTAACCGTTGCTAGGAGAGACG                                 |
|                         | Splink #2                                       | GTGGCTGAATGAGACTGGTGTGCGAC                                   |
| <b>piggyBac primers</b> | pBac LE #1                                      | CAGTGACACTTACCGCATTGACAAGC                                   |
|                         | pBac LE #2                                      | GCGACTGAGATGTCCTAAATGCAC                                     |
|                         | pBac RE #1                                      | CGATATACAGACCGATAAAACACATGCGTC                               |
|                         | pBac RE #2                                      | ACGCATGATTATCTTTAACGTACGTCAC                                 |
